# Supplementary material for: A MICROFLUIDIC CHIP FOR PULMONARY ARTERIAL HYPERTENSION
Source: Research Square preprint supplement (doi:10.21203/rs.3.rs-598765/v1), 2021-06-07
Supplement: Supplementary file 17 [file 28e23f09330ba9af3d8f5aca.xlsx]

## Sheet: ECFC.EC.DS
gene

## Sheet: ECFC.SMC.DS
gene

## Sheet: Adeno.EC.DS
gene

## Sheet: Adeno.SMC.DS
gene
